# Supplementary material
Source: Research Square preprint supplement (doi:10.21203/rs.3.rs-9998209/v1)
Supplement: Supplementary file 1 [file 691b26cb191addbe6f394a98.docx]

**Supplementary Material**

# Supplementary Table S1. Subgroup analyses in the MIMIC-IV-ED held-out test set

| **Subgroup** | **N** | **Sepsis n (%)** | **XGBoost AUROC** | **95% CI** | **qSOFA AUROC** | **95% CI** |
| --- | --- | --- | --- | --- | --- | --- |
| Overall | 41,818 | 2,541 (6.1) | 0.875 | 0.868-0.882 | 0.614 | 0.604-0.624 |
| Age <65 years | 23,965 | 1,210 (5.0) | 0.878 | 0.867-0.888 | 0.609 | 0.595-0.622 |
| Age >=65 years | 17,850 | 1,331 (7.5) | 0.868 | 0.858-0.879 | 0.615 | 0.601-0.628 |
| Male | 20,244 | 1,378 (6.8) | 0.866 | 0.857-0.875 | 0.610 | 0.597-0.624 |
| Female | 21,574 | 1,163 (5.4) | 0.882 | 0.871-0.892 | 0.619 | 0.605-0.634 |
| ESI 1-2 | 23,989 | 1,752 (7.3) | 0.885 | 0.877-0.893 | 0.633 | 0.622-0.645 |
| ESI 3-5 | 17,816 | 788 (4.4) | 0.846 | 0.832-0.859 | 0.546 | 0.534-0.560 |

Note: ESI = Emergency Severity Index. AUROC = area under the receiver operating characteristic curve; CI = 95% confidence interval calculated by 1,000 bootstrap resamples within each subgroup.
